# Supplementary material for: Stabilized well-dispersed Pd(0) nanoparticles for aminocarbonylation of aryl halides
Source: Royal Society of Chemistry journal article supplement (doi:10.1039/c1dt10927h), 2011-01-01
Supplement: c1dt10927h.pdf [file c1dt10927h.pdf]

## Supporting Information

### Stabilized Well-dispersed Pd(0) Nanoparticles for Aminocarbonylation of Aryl Halides

Yinghuai Zhu\*, Li Chuanzhao, Algin Oh Biying, Meriska Sudarmadji, Anqi Chen, Dang Thanh Tuan, Abdul M Seayad

*Institute of Chemical and Engineering Sciences, No 1 Pesek Road, Jurong Island Singapore  
627833. E-mail: zhu\_yinghuai@ices.a-star.edu.sg*

**Figure S-1.** XPS spectrum (a), TEM image (b) of nano-Pd after 5 runs and TEM image (c) of nano-Pd after storing 4 weeks under argon.

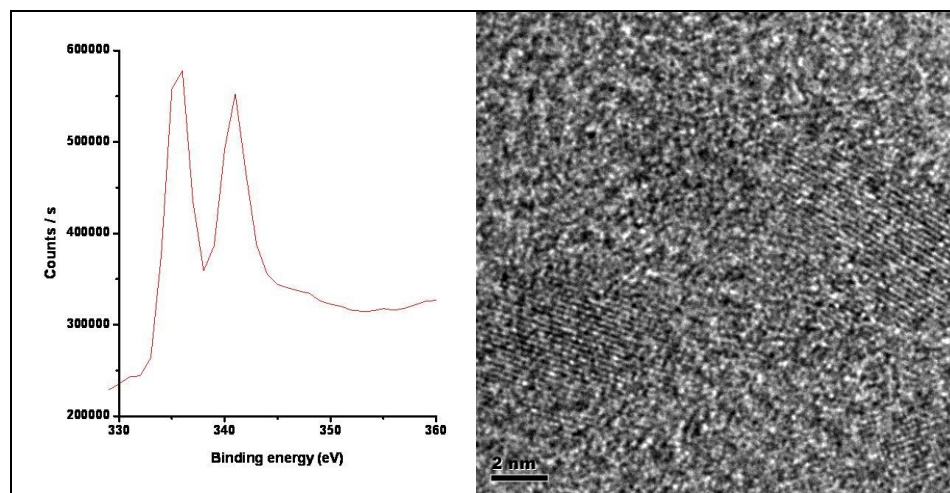

(a)

(b)

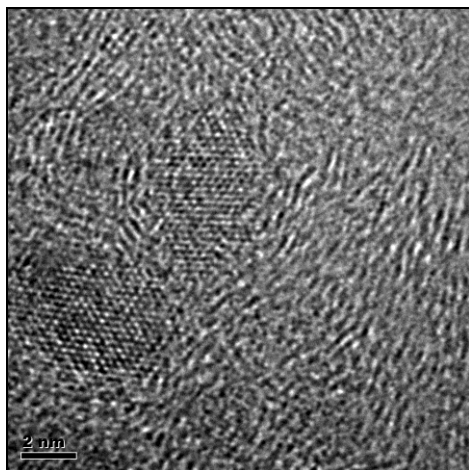

(c)

### Spectroscopic data for products.

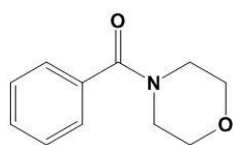

***N*-Benzoylmorpholine.** Yield 142 mg (74%), colorless oil.  $^1\text{H}$  NMR ( $\text{CDCl}_3$ )  $\delta$  (ppm): 3.44-3.77 (m, 8H), 7.40 (m, 5H);  $^{13}\text{C}$  NMR ( $\text{CDCl}_3$ )  $\delta$  (ppm): 42.6, 48.2, 66.9, 127.1, 128.6, 129.9, 135.3, 170.4. [3].

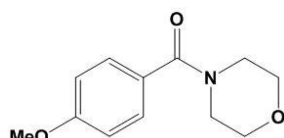

***N*-(*p*-Methoxybenzoyl)morpholine.** Yield 177 mg (80%), colorless oil.  $^1\text{H}$  NMR ( $\text{CDCl}_3$ )  $\delta$  (ppm): 3.60-3.67 (m, 8H), 3.81 (s, 3H); 6.79-6.90 (m, 2H); 7.36-7.38 (m, 2H);  $^{13}\text{C}$  NMR ( $\text{CDCl}_3$ )  $\delta$  (ppm): 41.5, 48.4, 55.3, 67.1, 114.4, 127.3, 129.2, 160.9.1, 170.4 [4].

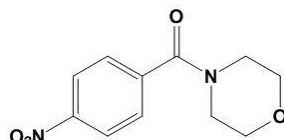

***N*-(*p*-Nitrobenzoyl)morpholine.** Yield 196 mg (83%), yellow solid.  $^1\text{H}$  NMR ( $\text{CDCl}_3$ )  $\delta$  (ppm): 3.23-3.85 (m, 8H), 7.53 (d, 2H), 8.22 (d, 2H).  $^{13}\text{C}$  NMR ( $\text{CDCl}_3$ )  $\delta$  (ppm): 42.5, 48.7, 67.3, 123.9, 128.4, 141.5, 148.4, 168.3 [5].

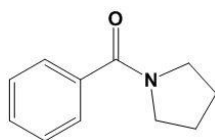

**N-Benzoylpyrrolidine.** Yield 105 mg (60%), colorless oil.  $^1\text{H}$  NMR ( $\text{CDCl}_3$ )  $\delta$  (ppm): 1.68-1.76 (m, 4H), 3.23-3.46 (m, 4H), 7.22-7.30 (m, 5H);  $^{13}\text{C}$  NMR ( $\text{CDCl}_3$ )  $\delta$  (ppm): 23.8, 25.8, 45.5, 48.9, 126.4, 127.6, 129.1, 136.6, 169.0 [6].

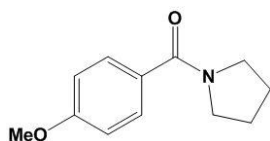

**N-(p-Methoxybenzoyl)pyrrolidine.** Yield 138 mg (67%) colorless solid.  $^1\text{H}$  NMR ( $\text{CDCl}_3$ )  $\delta$  (ppm): 1.83 (m, 4H), 3.57 (t, 4H), 3.70 (s, 3H), 6.77-6.80 (m, 2H), 7.39-7.43 (m, 2H);  $^{13}\text{C}$  NMR ( $\text{CDCl}_3$ )  $\delta$  (ppm): 24.1, 26.3, 46.2, 49.6, 55.1, 113.2, 129.1, 131.9, 160.6, 172.1 [7].

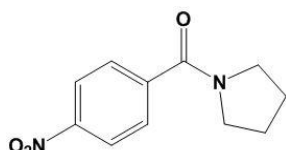

**N-(p-Nitrobenzoyl)pyrrolidine.** Yield 156 mg (71%) yellow solid.  $^1\text{H}$  NMR ( $\text{CDCl}_3$ )  $\delta$  (ppm): 1.83-1.87 (m, 4H), 3.31-3.62 (m, 4H), 7.20-8.21 (m, 4H);  $^{13}\text{C}$  NMR ( $\text{CDCl}_3$ )  $\delta$  (ppm): 23.3, 25.4, 45.7, 49.5, 117.1, 127.1, 131.6, 149.7, 165.0 [8].

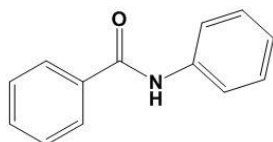

**Phenylbenzamide.** Yield 152 mg (77%), colorless solid.  $^1\text{H}$  NMR ( $\text{CDCl}_3$ )  $\delta$  (ppm): 7.13-7.87 (m, 10H);  $^{13}\text{C}$  NMR ( $\text{CDCl}_3$ )  $\delta$  (ppm): 120.3, 124.6, 127.1, 128.8, 129.1, 131.9, 135.0, 138.0, 165.8 [9].

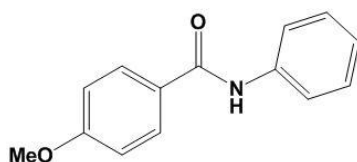

**N-Phenyl-4-methoxybenzamide.** Yield 208 mg (86%), white solid.  $^1\text{H}$  NMR ( $\text{CDCl}_3$ )  $\delta$  (ppm): 3.80 (s, 3H), 6.87-7.94 (m, 9H);  $^{13}\text{C}$  NMR ( $\text{CDCl}_3$ )  $\delta$  (ppm): 55.5, 122.1, 124.1, 126.7, 127.8, 128.7, 130.5, 133.9, 138.4, 165.6 [10].

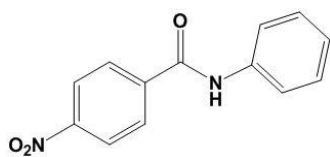

**N-Phenyl-4-nitrobenzamide.** Yield 215 mg (89%), pale-yellow solid.  $^1\text{H}$  NMR ( $\text{CDCl}_3$ )  $\delta$  (ppm): 7.06-8.30 (m, 10H);  $^{13}\text{C}$  NMR ( $\text{CDCl}_3$ )  $\delta$  (ppm): 120.6, 123.5, 124.5, 128.7, 129.3, 131.9, 138.5, 139.4, 150.4, 166.0 [11].

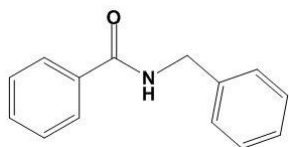

**N-Benzylbenzamide.** Yield 138 mg (65%) colorless solid.  $^1\text{H}$  NMR ( $\text{CDCl}_3$ )  $\delta$  (ppm): 4.60 (d, 2H), 6.70 (s, 1H), 7.30-7.80 (m, 10H);  $^{13}\text{C}$  NMR ( $\text{CDCl}_3$ )  $\delta$  (ppm): 44.1, 127.0, 127.6, 127.9, 128.6, 128.8, 131.5, 134.4, 138.3, 167.4 [9, 10].

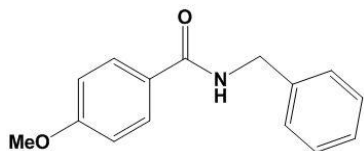

**N-Benzyl-4-methoxybenzamide.** Yield 178 mg (74%) colorless solid.  $^1\text{H}$  NMR ( $\text{CDCl}_3$ )  $\delta$  (ppm): 3.67 (s, 3H), 4.42 (d, 2H), 6.30 (s, 1H), 6.70-7.74 (m, 10H).  $^{13}\text{C}$  NMR ( $\text{CDCl}_3$ )  $\delta$  (ppm): 43.7, 55.4, 113.6, 126.3, 127.6, 127.9, 128.5, 128.7, 138.8, 162.1, 167.2 [10].

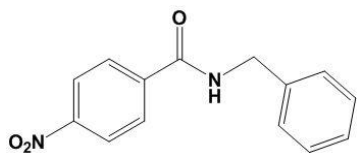

**N-Benzyl-4-nitrobenzamide.** Yield 174 mg (68%) colorless solid.  $^1\text{H}$  NMR ( $\text{CDCl}_3$ )  $\delta$  (ppm): 4.60 (d, 2H), 6.65 (s, 1H), 7.10-8.09 (m, 10H);  $^{13}\text{C}$  NMR ( $\text{CDCl}_3$ )  $\delta$  (ppm): 43.6, 123.4, 127.5, 127.9, 128.2, 128.8, 137.5, 139.8, 149.5, 167.5 [11].

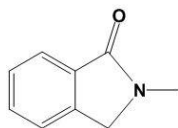

**2-Methylisoindolin-1-one.** Yield 54 mg (37%) and 13 mg (9%) from bromide and chloride, respectively, colorless solid.  $^1\text{H}$  NMR ( $\text{CDCl}_3$ )  $\delta$  (ppm): 3.21 (s, 3H), 4.38 (s, 2H), 7.43-7.85 (m, 4H);  $^{13}\text{C}$  NMR ( $\text{CDCl}_3$ )  $\delta$  (ppm): 29.7, 52.0, 122.6, 123.6, 128.0, 133.0, 141.0, 168.7 [12].

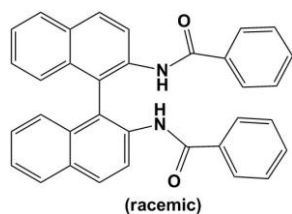

**Racemic-*N,N'*-(1,1'-Binaphthyl-2,2'-diyl)dibenzamide.** Yield 375 mg

(76%), pale white solid.  $^1\text{H}$  NMR ( $\text{CDCl}_3$ )  $\delta$  (ppm): 7.12-7.90 (m, 16H), 7.72 (s, 2H), 7.91 (d, 2H), 8.04 (d, 2H), 8.66 (d, 2H);  $^{13}\text{C}$  NMR ( $\text{CDCl}_3$ )  $\delta$  (ppm): 120.71, 121.43, 125.02, 125.75, 126.74, 127.69, 128.52, 128.65, 130.24, 131.33, 131.83, 132.19, 134.21, 135.26, 165.82 [13].

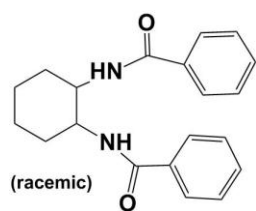

**Racemic-*N,N'*-(cyclohexane-1,2-diyl)dibenzamide.** Yield 220 mg (68%),

colorless solid.  $^1\text{H}$  NMR ( $\text{DMSO-d}_6$ )  $\delta$  (ppm): 1.29 (m, 2H), 1.50 (m, 2H), 1.75 (m, 2H), 1.92 (m, 2H), 3.94 (m, 2H), 7.37-7.45 (m, 6H), 7.69-7.72 (m, 4H), 8.25 (m, 2H);  $^{13}\text{C}$  NMR ( $\text{DMSO-d}_6$ )  $\delta$  (ppm): 24.65, 31.58, 52.92, 127.08, 128.07, 130.85, 134.90, 168.40 [14].

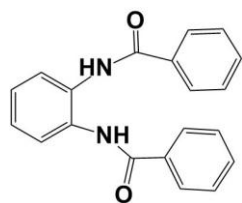

***N,N'*-(1,2-phenylene)dibenzamide.** Yield 228 mg (72%), pale white solid.

$^1\text{H}$  NMR ( $\text{CDCl}_3$ )  $\delta$  (ppm): 7.20-7.63 (m, 10H), 8.07-8.12 (m, 6H);  $^{13}\text{C}$  NMR ( $\text{CDCl}_3$ )  $\delta$  (ppm): 128.50, 128.89, 129.32, 130.23, 130.59, 133.84, 134.55, 172.42 [15].

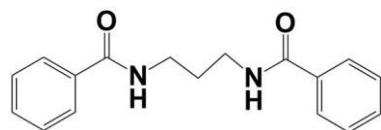

***N,N'*-(propane-1,3-diyl)dibenzamide.** Yield 167 mg (59%),

colorless solid.  $^1\text{H}$  NMR ( $\text{DMSO-d}_6$ )  $\delta$  (ppm): 1.78 (t, 2H), 3.33 (m, 4H), 7.44-7.52 (m, 6H), 7.83-7.85 (m, 4H), 8.50 (t, 2H);  $^{13}\text{C}$  NMR ( $\text{DMSO-d}_6$ )  $\delta$  (ppm): 29.25, 37.00, 127.05, 128.22, 131.03, 134.55, 166.18 [16].

### Selected NMR spectra

#### $^1\text{H}$ NMR ( $\text{CDCl}_3$ ) of *N*-benzoylmorpholine

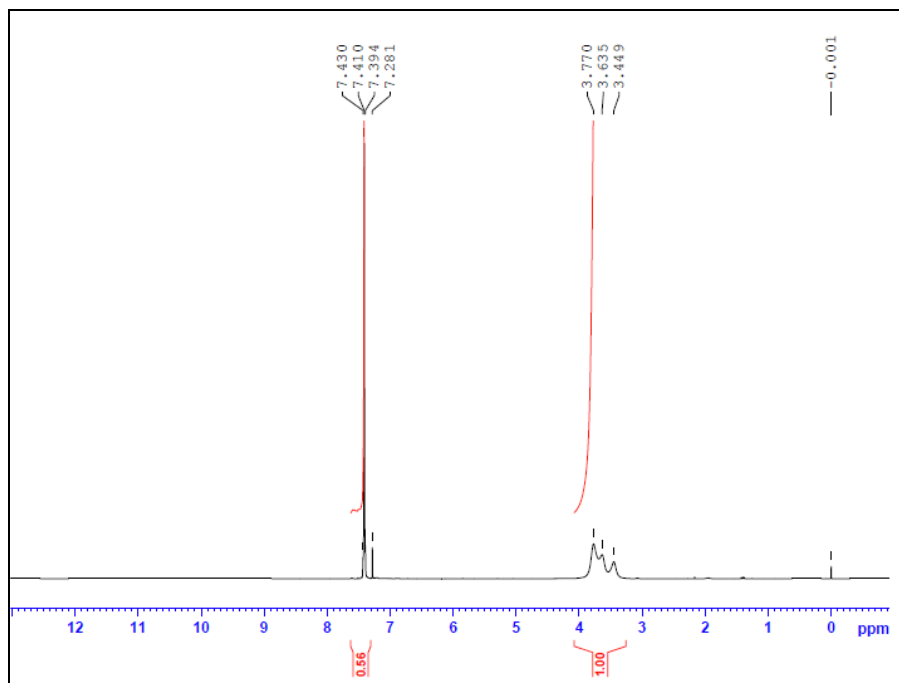

#### $^{13}\text{C}$ NMR ( $\text{CDCl}_3$ ) of *N*-benzoylmorpholine

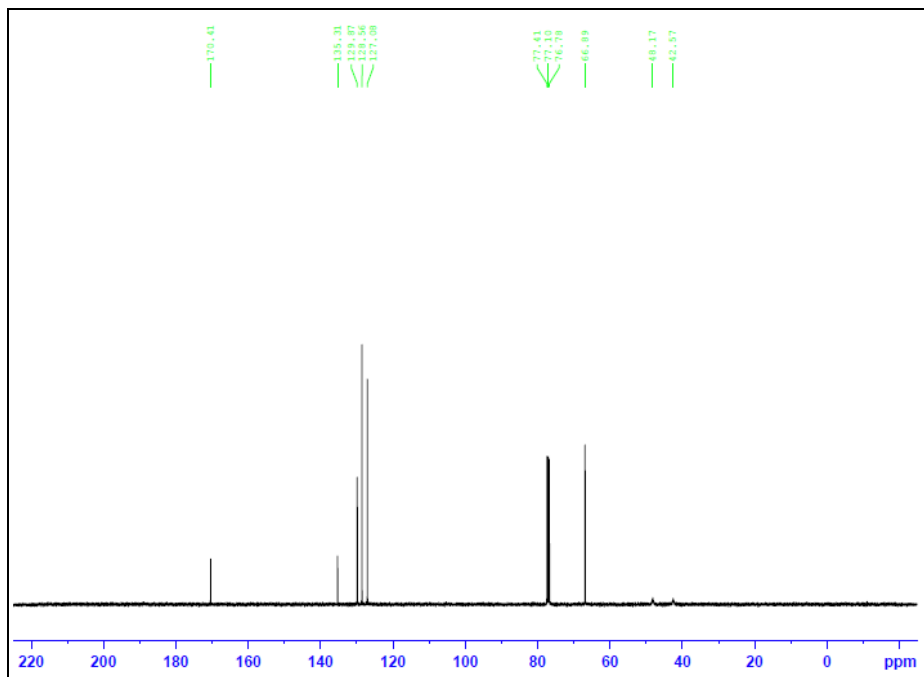

### $^1\text{H}$ NMR ( $\text{CDCl}_3$ ) of *N*-benzoylpyrrolidine

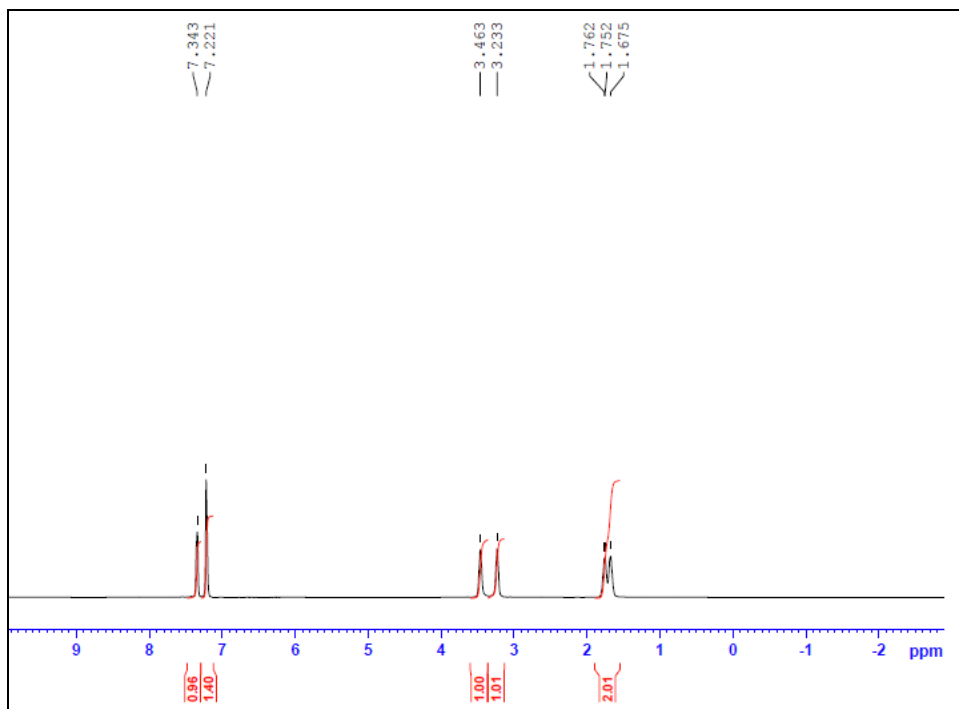

### $^{13}\text{C}$ NMR ( $\text{CDCl}_3$ ) of *N*-benzoylpyrrolidine

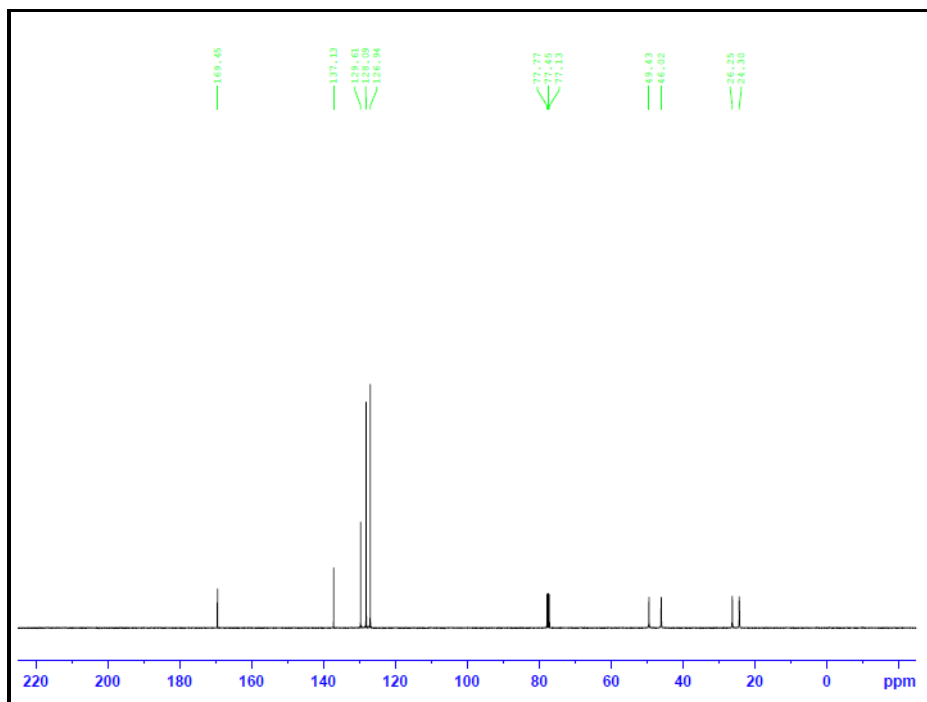

### $^1\text{H}$ NMR ( $\text{CDCl}_3$ ) of phenylbenzamide

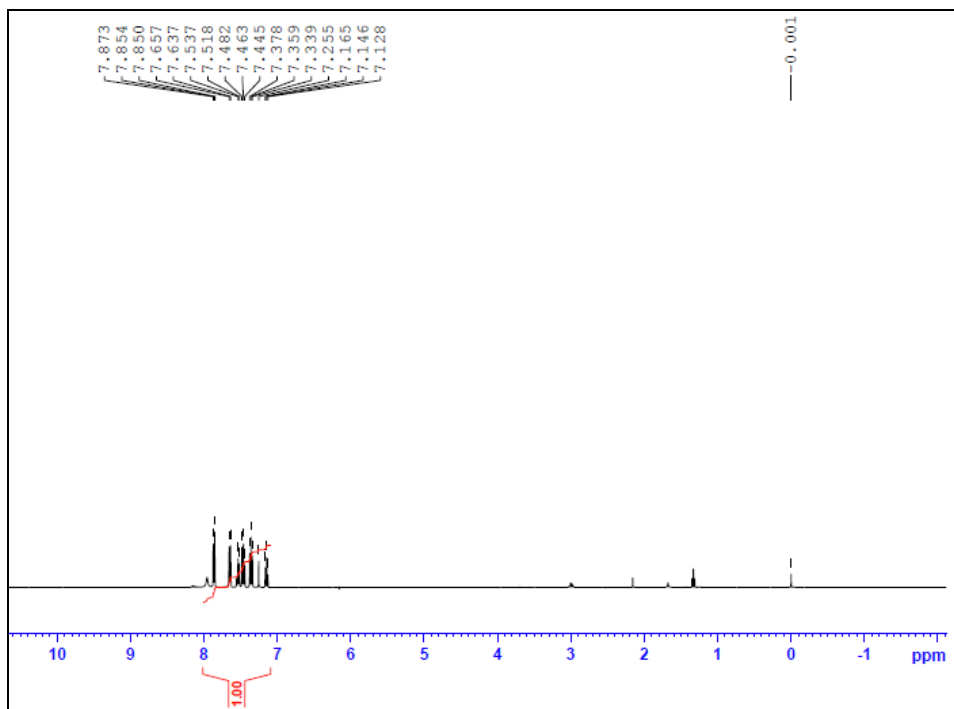

### $^{13}\text{C}$ NMR ( $\text{CDCl}_3$ ) of phenylbenzamide

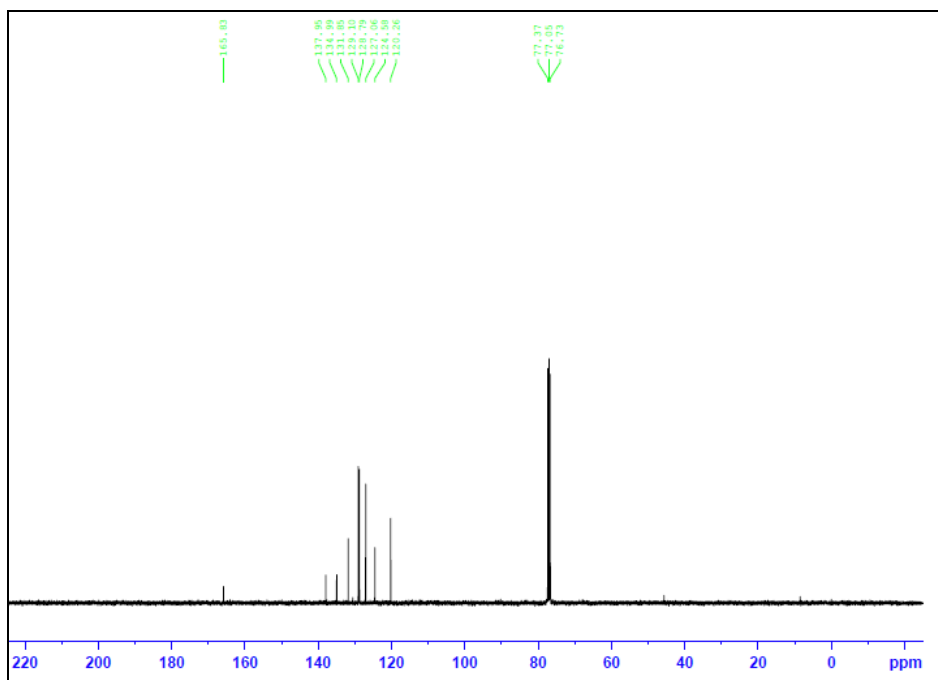



### $^1\text{H}$ NMR ( $\text{CDCl}_3$ ) of *N*-benzylbenzamide

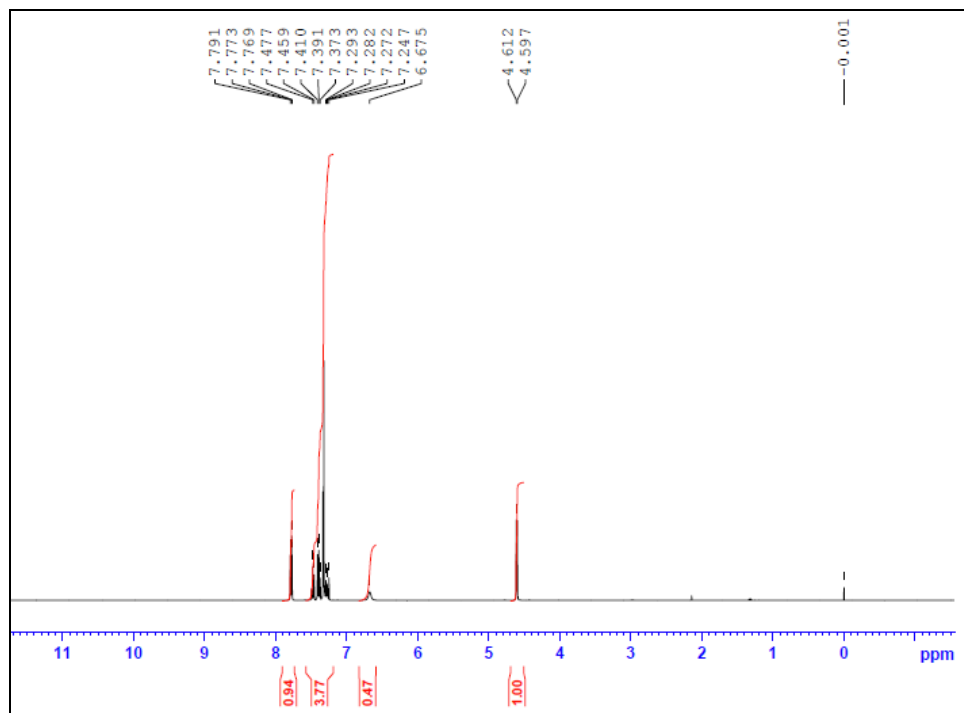

### $^{13}\text{C}$ NMR ( $\text{CDCl}_3$ ) of *N*-benzylbenzamide

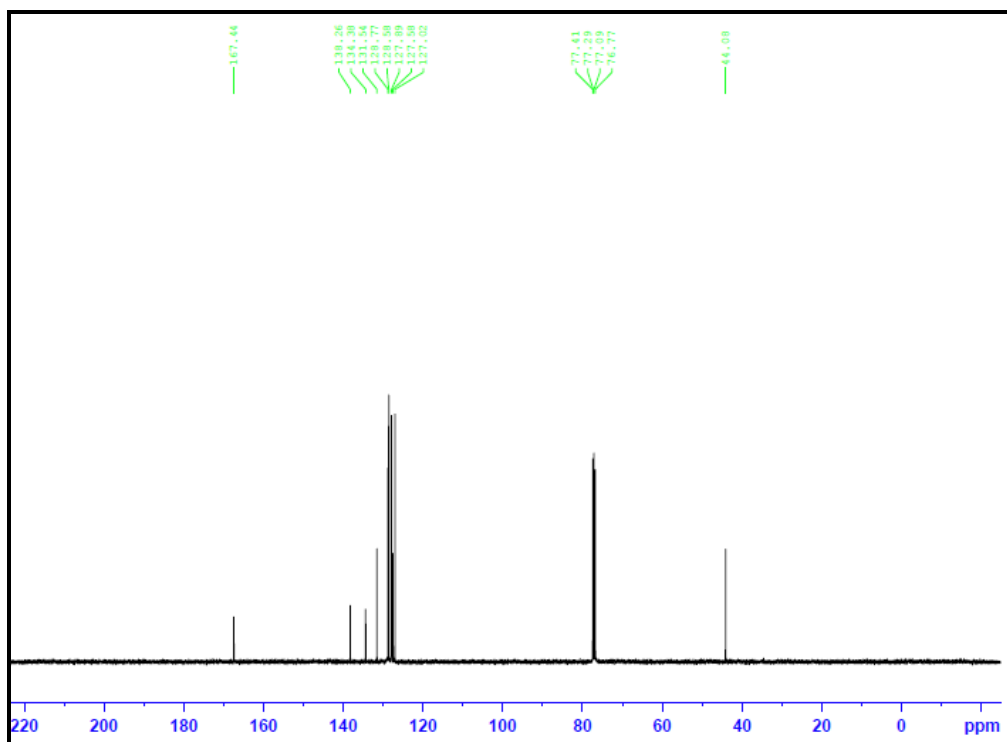

**$^1\text{H}$  NMR ( $\text{CDCl}_3$ ) of 2-methylisoindolin-1-one**

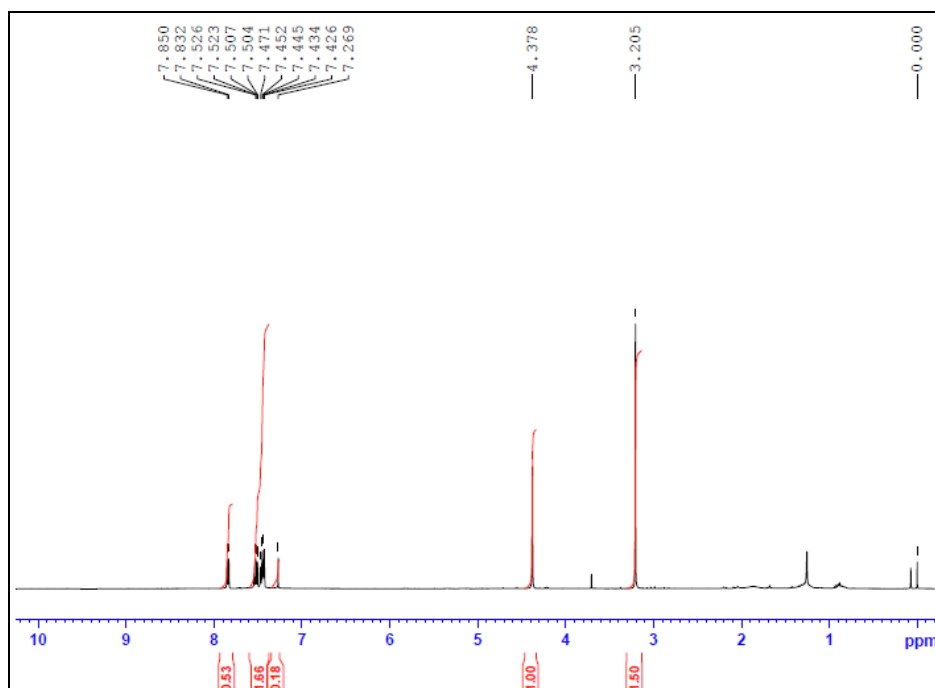

**$^{13}\text{C}$  NMR ( $\text{CDCl}_3$ ) of 2-methylisoindolin-1-one**

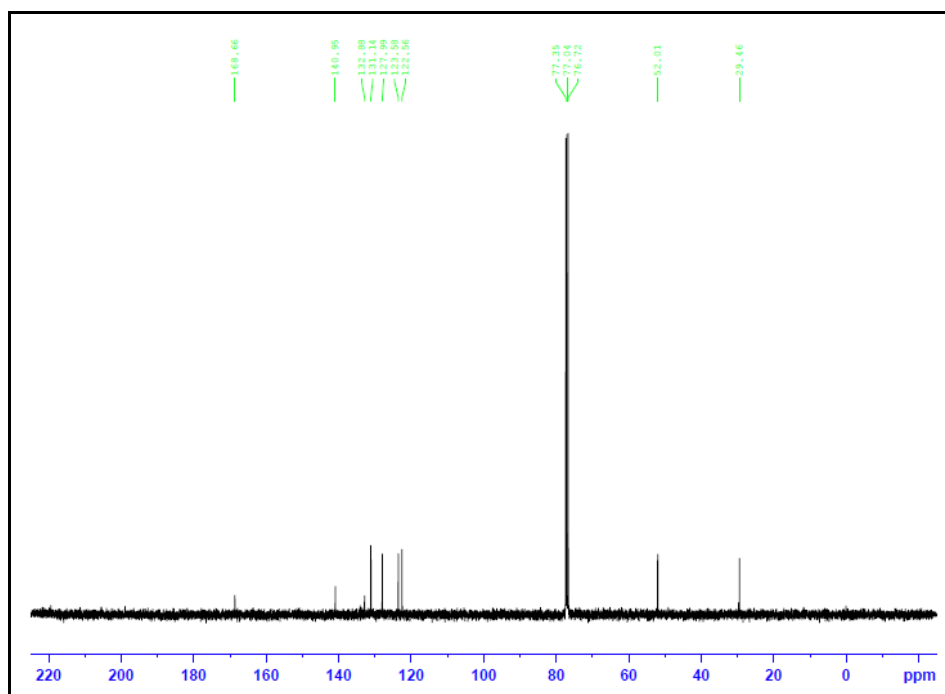

**<sup>1</sup>H NMR (CDCl<sub>3</sub>) of Racemic-N,N'-(1,1'-Binaphthyl-2,2'-diyl)dibenzamide**

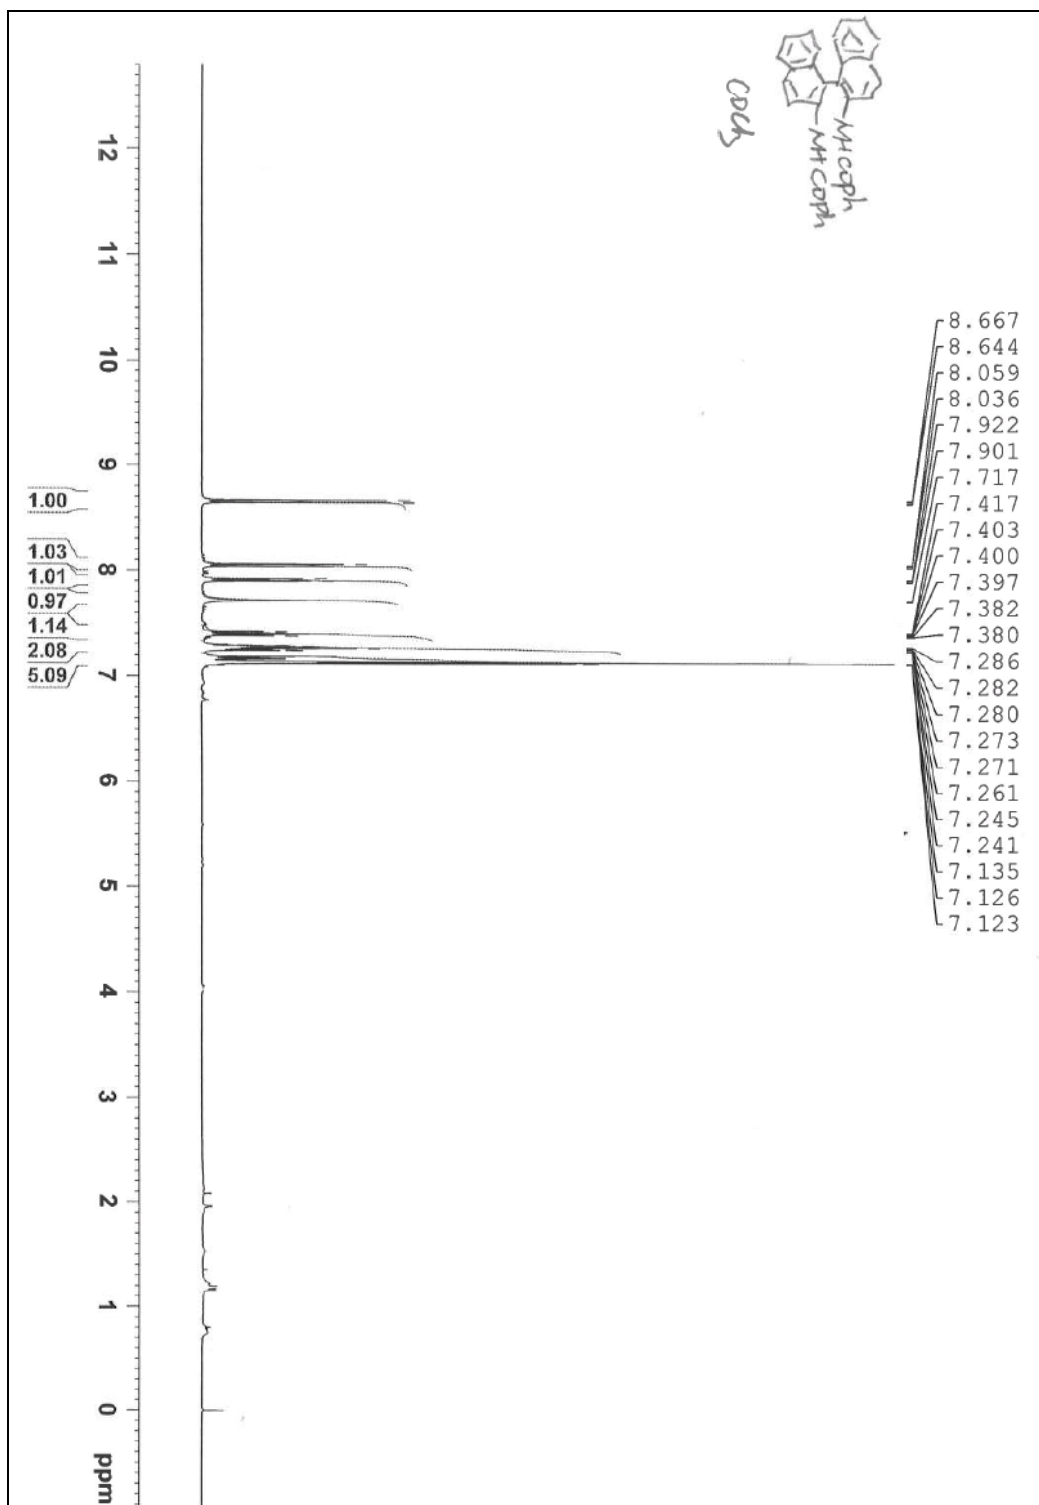

$^{13}\text{C}$  NMR ( $\text{CDCl}_3$ ) of *Racemic-N,N'-(1,1'-Binaphthyl-2,2'-diyl)dibenzamide*

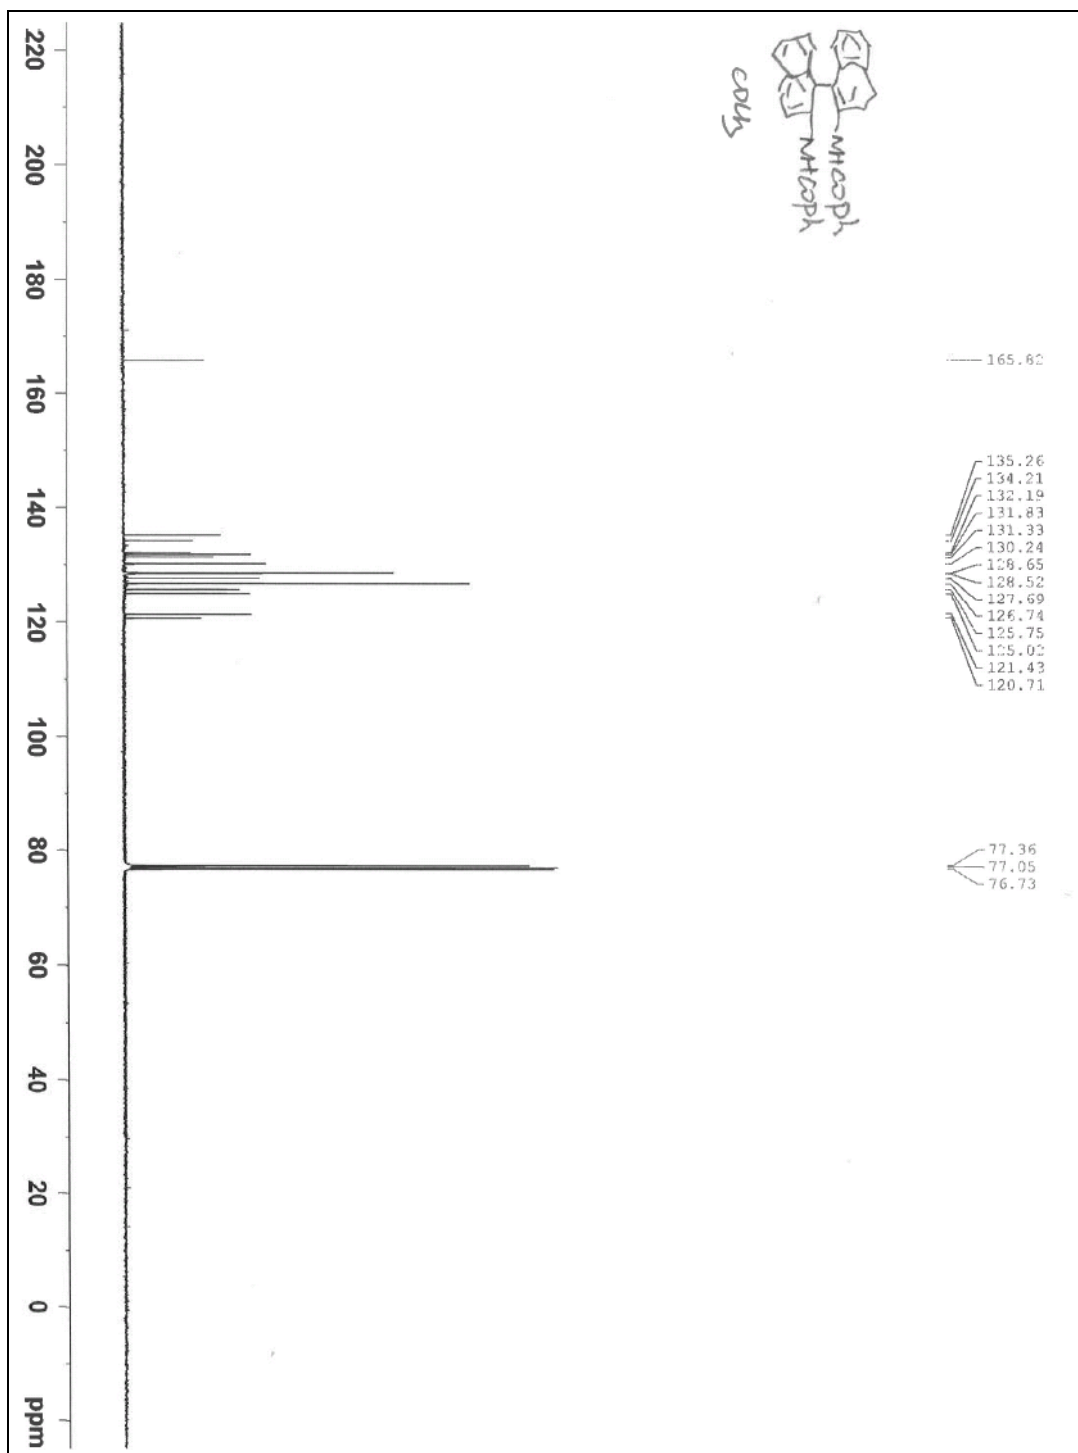

**$^1\text{H}$  NMR (DMSO- $d_6$ ) of *Racemic-N,N'*-(cyclohexane-1,2-diyl)dibenzamide**

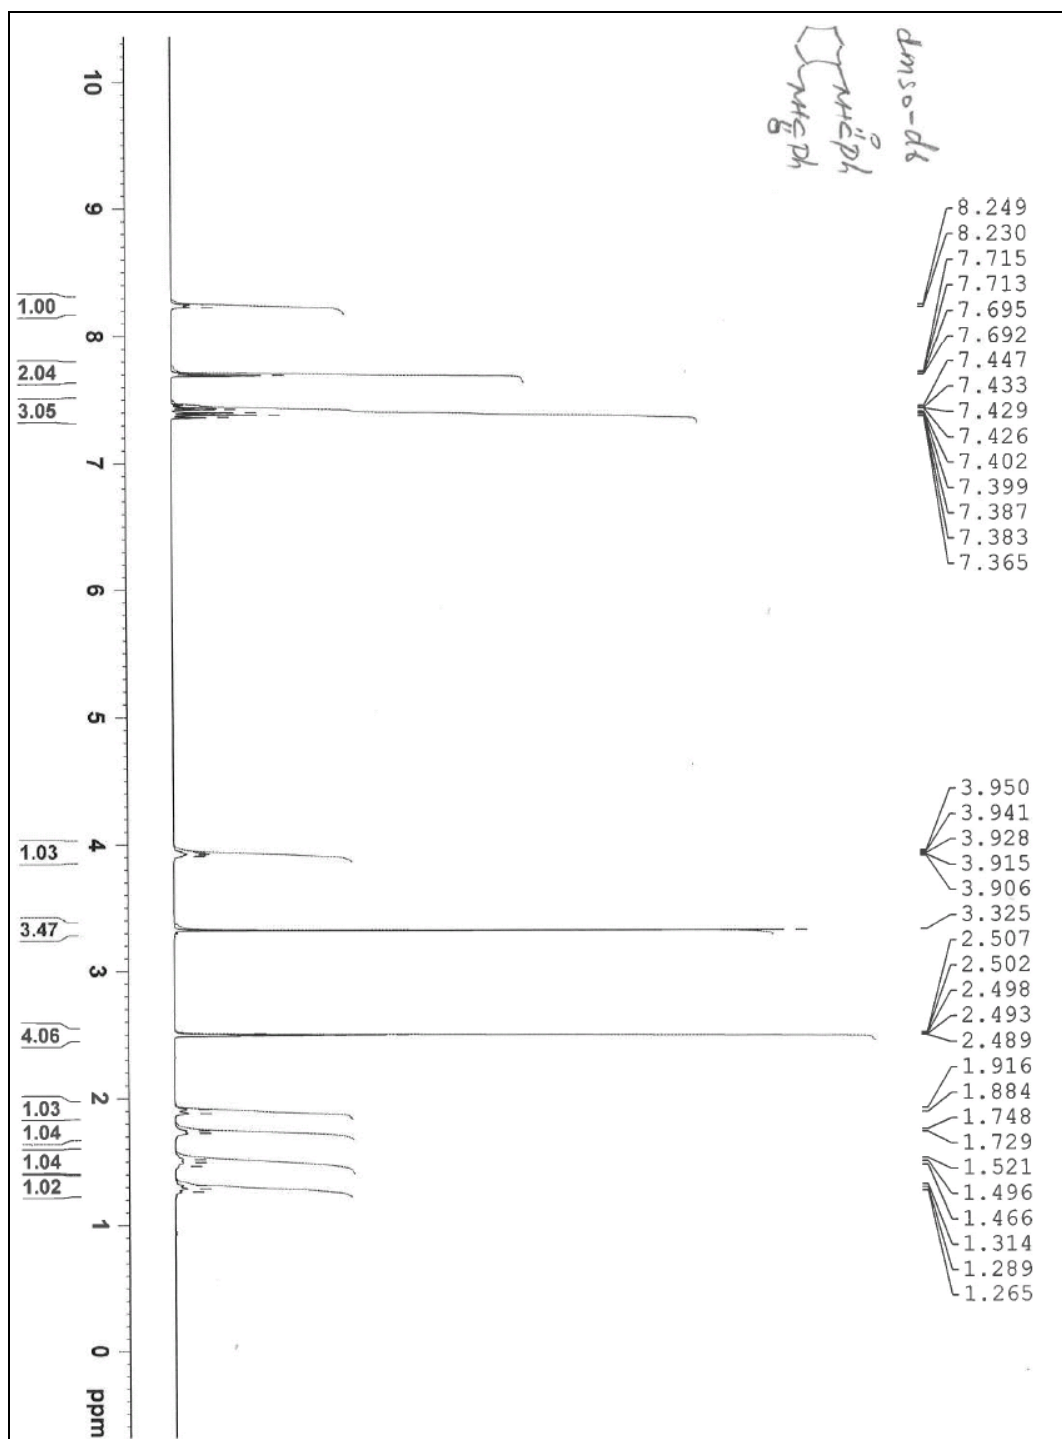

$^{13}\text{C}$  NMR (DMSO- $d_6$ ) of *Racemic-N,N'*-(cyclohexane-1,2-diyl)dibenzamide

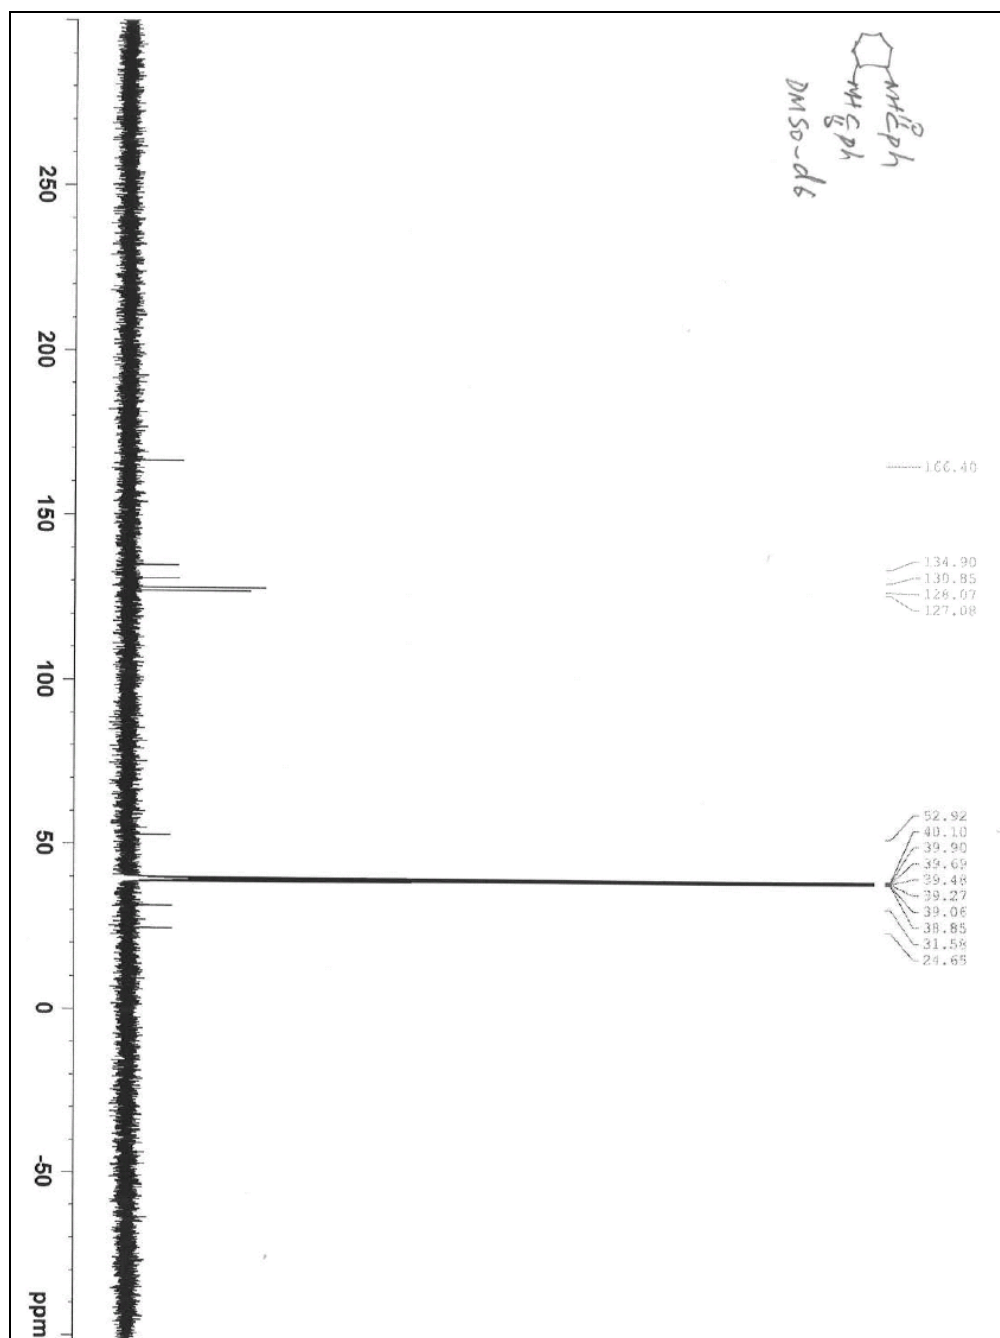

$^1\text{H}$  NMR (DMSO- $d_6$ ) of  $N,N'$ -(propane-1,3-diy)dibenzamide

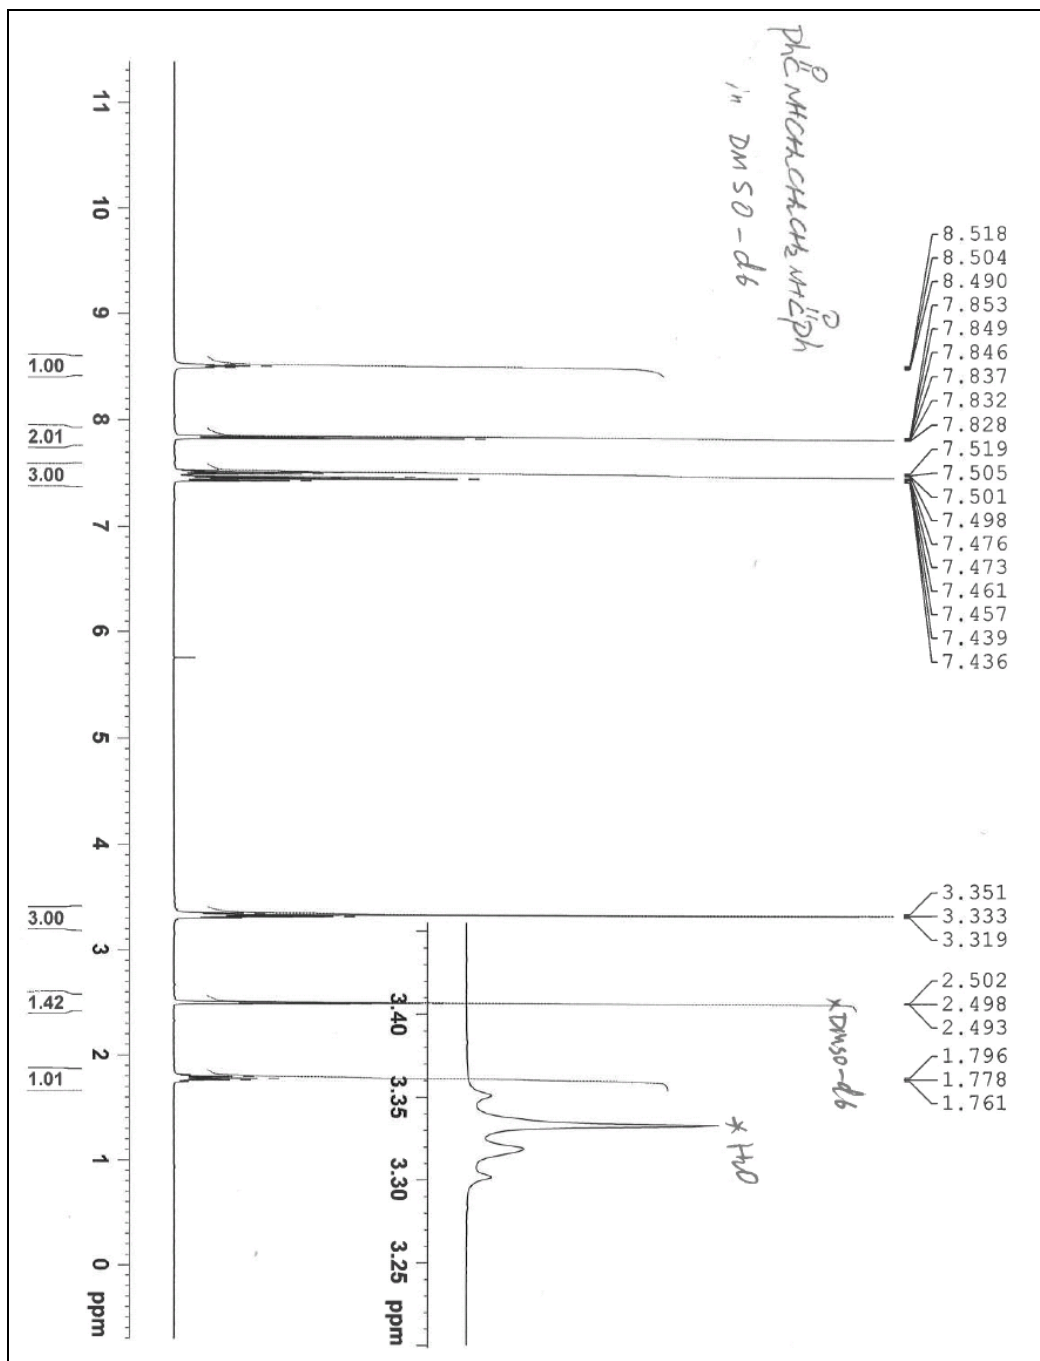

$^{13}\text{C}$  NMR (DMSO- $d_6$ ) of  $N,N'$ -(propane-1,3-diyl)dibenzamide

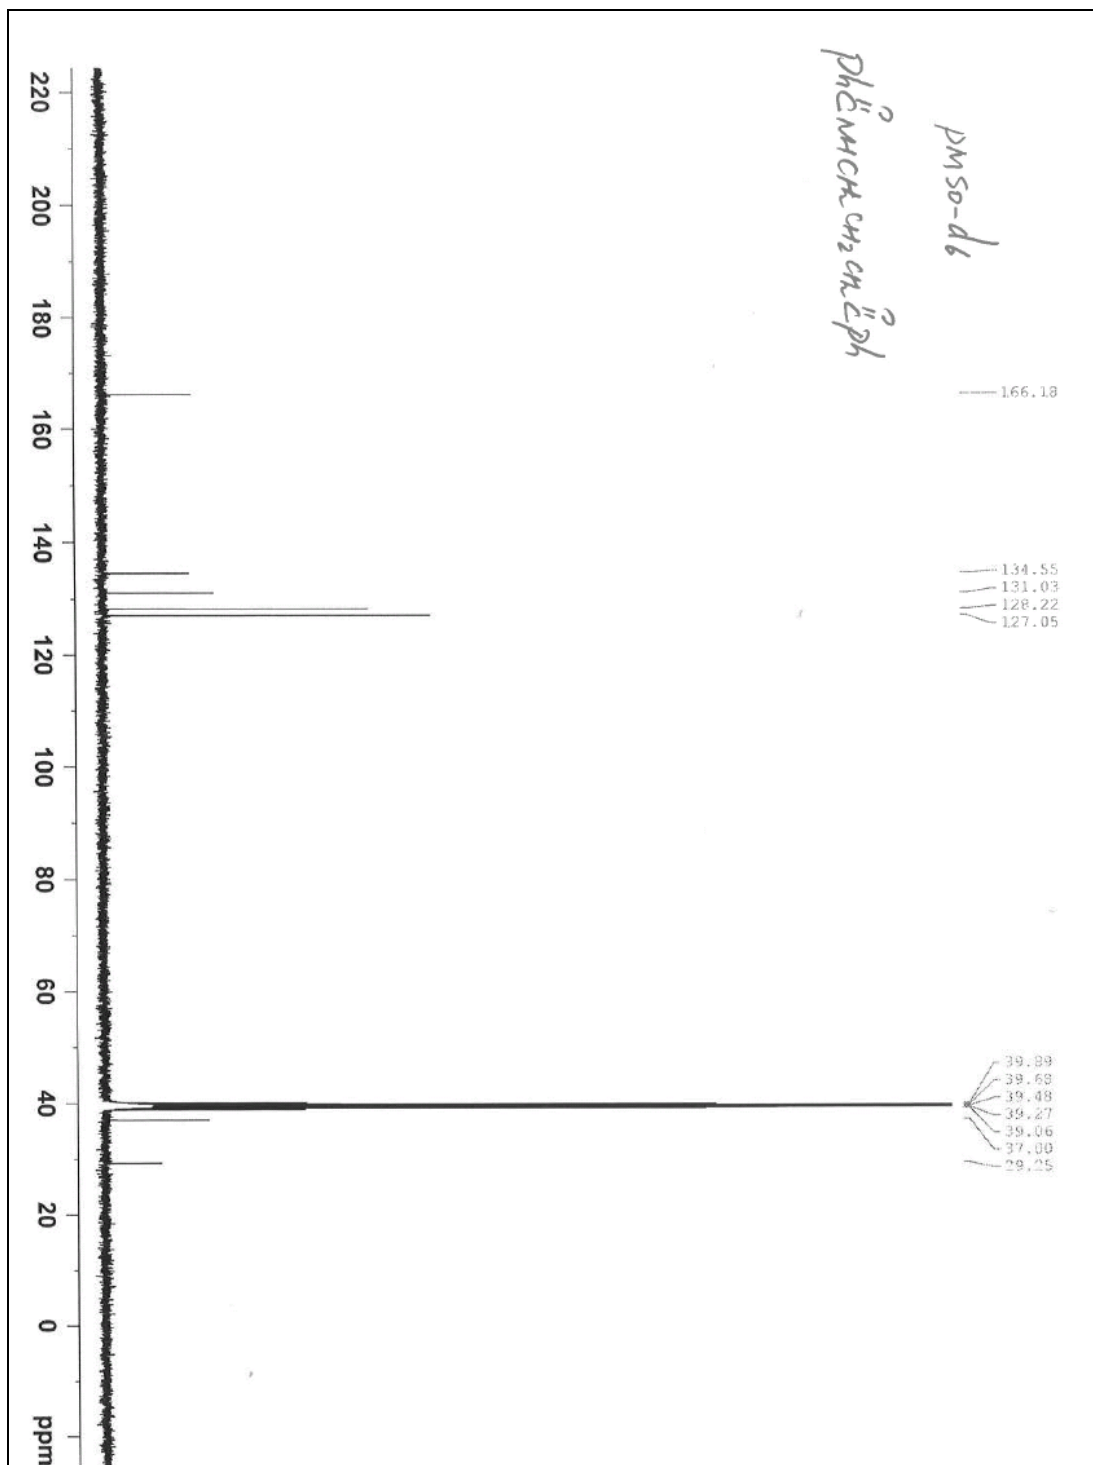



## References:

- [1] Jedrzejczak, M.; Motie, R. E.; Satchell, D. P. N. *J. Chem. Soc. Perkin Trans. 2* **1993**, *4*, 599-600.
- [2] Tillack, A.; Rudloff, I.; Beller, M. *Eur. J. Org. Chem.* **2001**, 523-528.
- [3] Raj, I. V.; Sudalai, A. *Tetrahedron Lett.* **2005**, *46*, 8303-8306.
- [4] Ishihara, K.; Yano, T. *Org. Lett.* **2004**, *6*, 1983-1986.
- [5] Magnus, P.; Hulme, C.; Weber, W. *J. Am. Chem. Soc.* **1994**, *116*, 4501-4502.
- [6] Zheming, R.; Lawrence, R. M.; Cooper, C. B. *Tetrahedron Lett.* **2005**, *47*, 7649-7651.
- [7] See Aldrich NMR Book.
- [8] Yamazaki, K.; Kondo, Y. *J. Comb. Chem.* **2004**, *6*, 121-125.
- [9] Qian, C.; Zhang, X.; Li, J.; Xu, F.; Zhang, Y.; Shen, Q. *Organometallics*, **2009**, *28*, 3856-3862.
- [10] Nordstrom, L. U.; Vogt, H.; Madsen, R. *J. Am. Chem. Soc.* **2008**, *130*, 17672-17673.
- [11] Katritzky, A. R.; Cai, C.; Singh, S. K. *J. Org. Chem.* **2006**, *71*, 3375-3380.
- [12] Morin-Phelippeau, B.; Favre-Fafet, A.; Hugues, F.; Commereuc, D.; Chauvin, Y. *J. Mol. Cat.* **1989**, *51*, 145-154.
- [13] Sudo, Y.; Shirasaki, D.; Harada, S.; Nishida, A. *J. Am. Chem. Soc.* **2008**, *130*, 12588-12589.
- [14] Anthony, S. P.; Basavaiah, K.; Radhakrishnan, T. P. *Crystal Growth & Design* **2005**, *5*, 1663-1666.
- [15] Phukan, K.; Ganguly, M.; Devi, N. *Synth. Commun.* **2009**, *39*, 2694-2701.
- [16] Zhang, Z.; Yin, Z.; Nicholas, A. M.; John, F. K.; Wang, T. *Org. Lett.* **2003**, *5*, 3399-3402.
